# Supplementary material for: Quorum sensing systems differentially regulate the production of phenazine-1-carboxylic acid in the rhizobacterium Pseudomonas aeruginosa PA1201
Source: PubMed Central journal article supplement (PMC4960564; doi:10.1038/srep30352), 2016-07-26
Supplement: srep30352-s1.pdf [file srep30352-s1.pdf]

## Supplementary Material

### **Quorum sensing systems differentially regulate the production of phenazine-1-carboxylic acid in the rhizobacterium *Pseudomonas aeruginosa* PA1201**

**Authors:** Shuang Sun<sup>1</sup>, Lian Zhou<sup>1</sup>, Kaiming Jin<sup>1</sup>, Haixia Jiang<sup>1</sup>, Ya-Wen He<sup>1\*</sup>

<sup>1</sup>State Key Laboratory of Microbial Metabolism, School of Life Sciences & Biotechnology, Shanghai Jiao Tong University, Shanghai 200240, China

#### Contents

Supplementary Figure S1

Supplementary Figure S2

Supplementary Figure S3

Supplementary Figure S4

Supplementary Figure S5

Supplementary TableS1

Supplementary TableS2

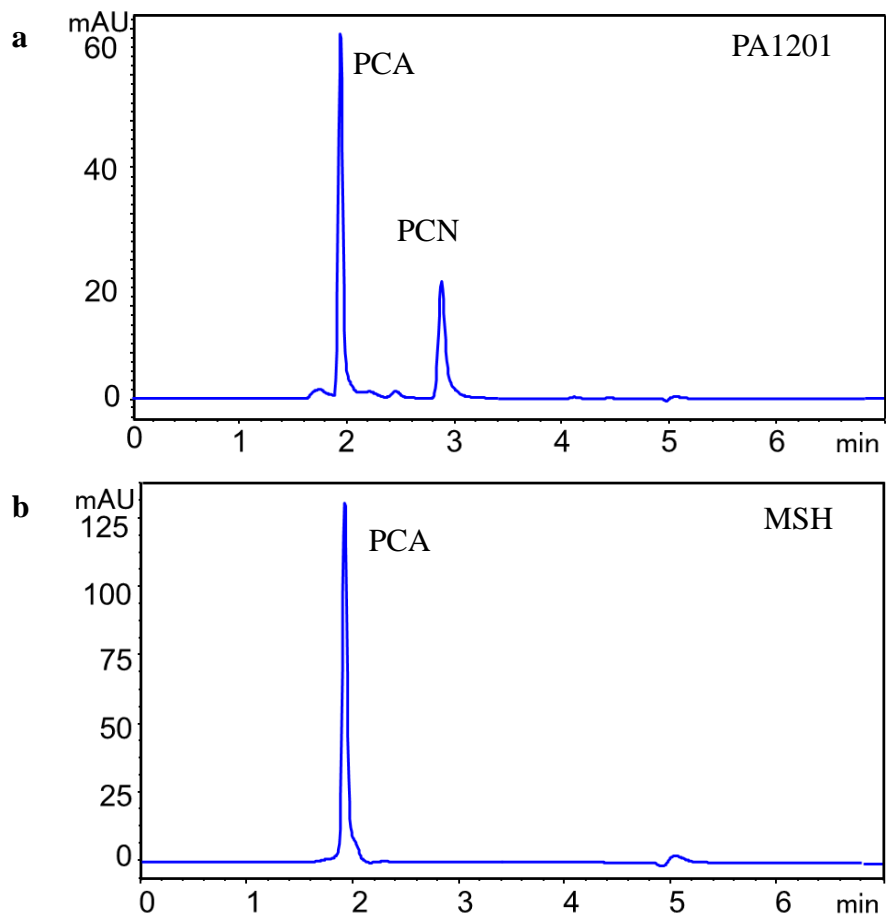

**Supplementary Figure S1** HPLC analysis of strain PA1201 and strain MSH with mutations in *phzM*, *phzS*, and *phzH*.

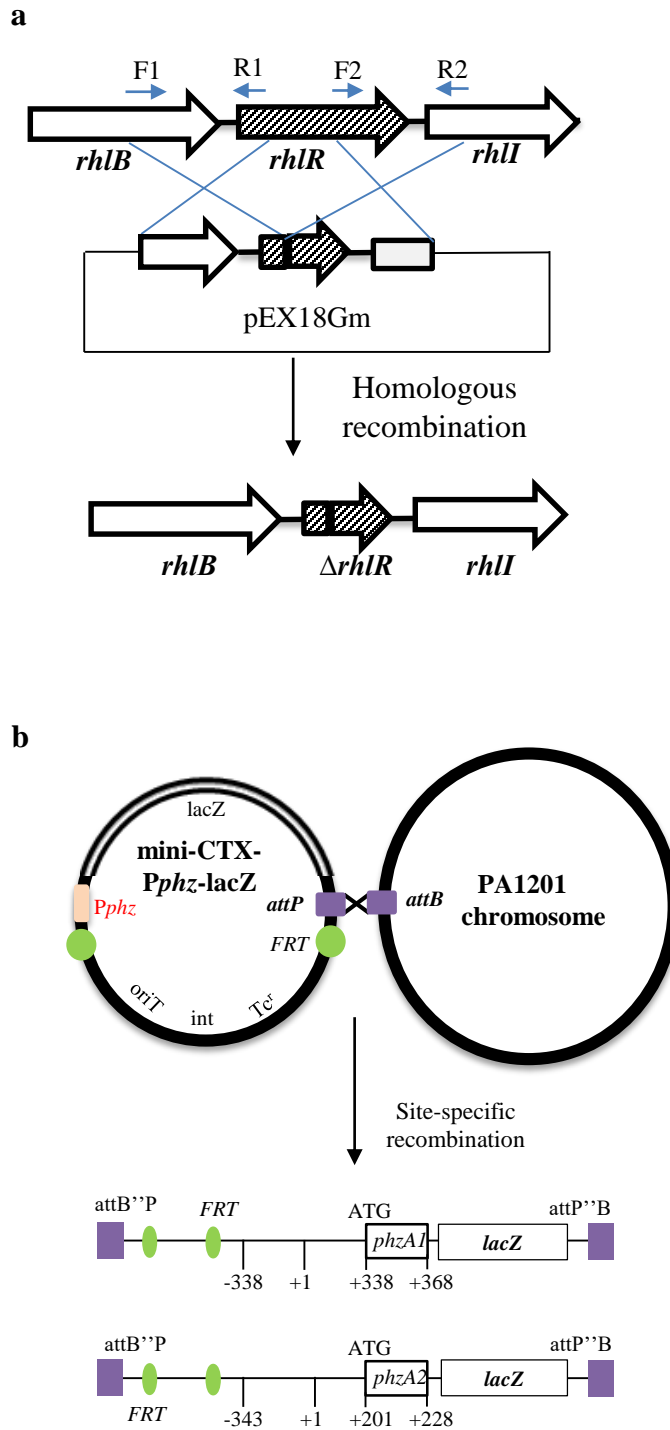

**Supplementary Figure S2** The schematic strategies for (a) *in-frame* gene deletion and (b) construction of a single copy reporter for the gene cluster *phz1* or *phz2*.

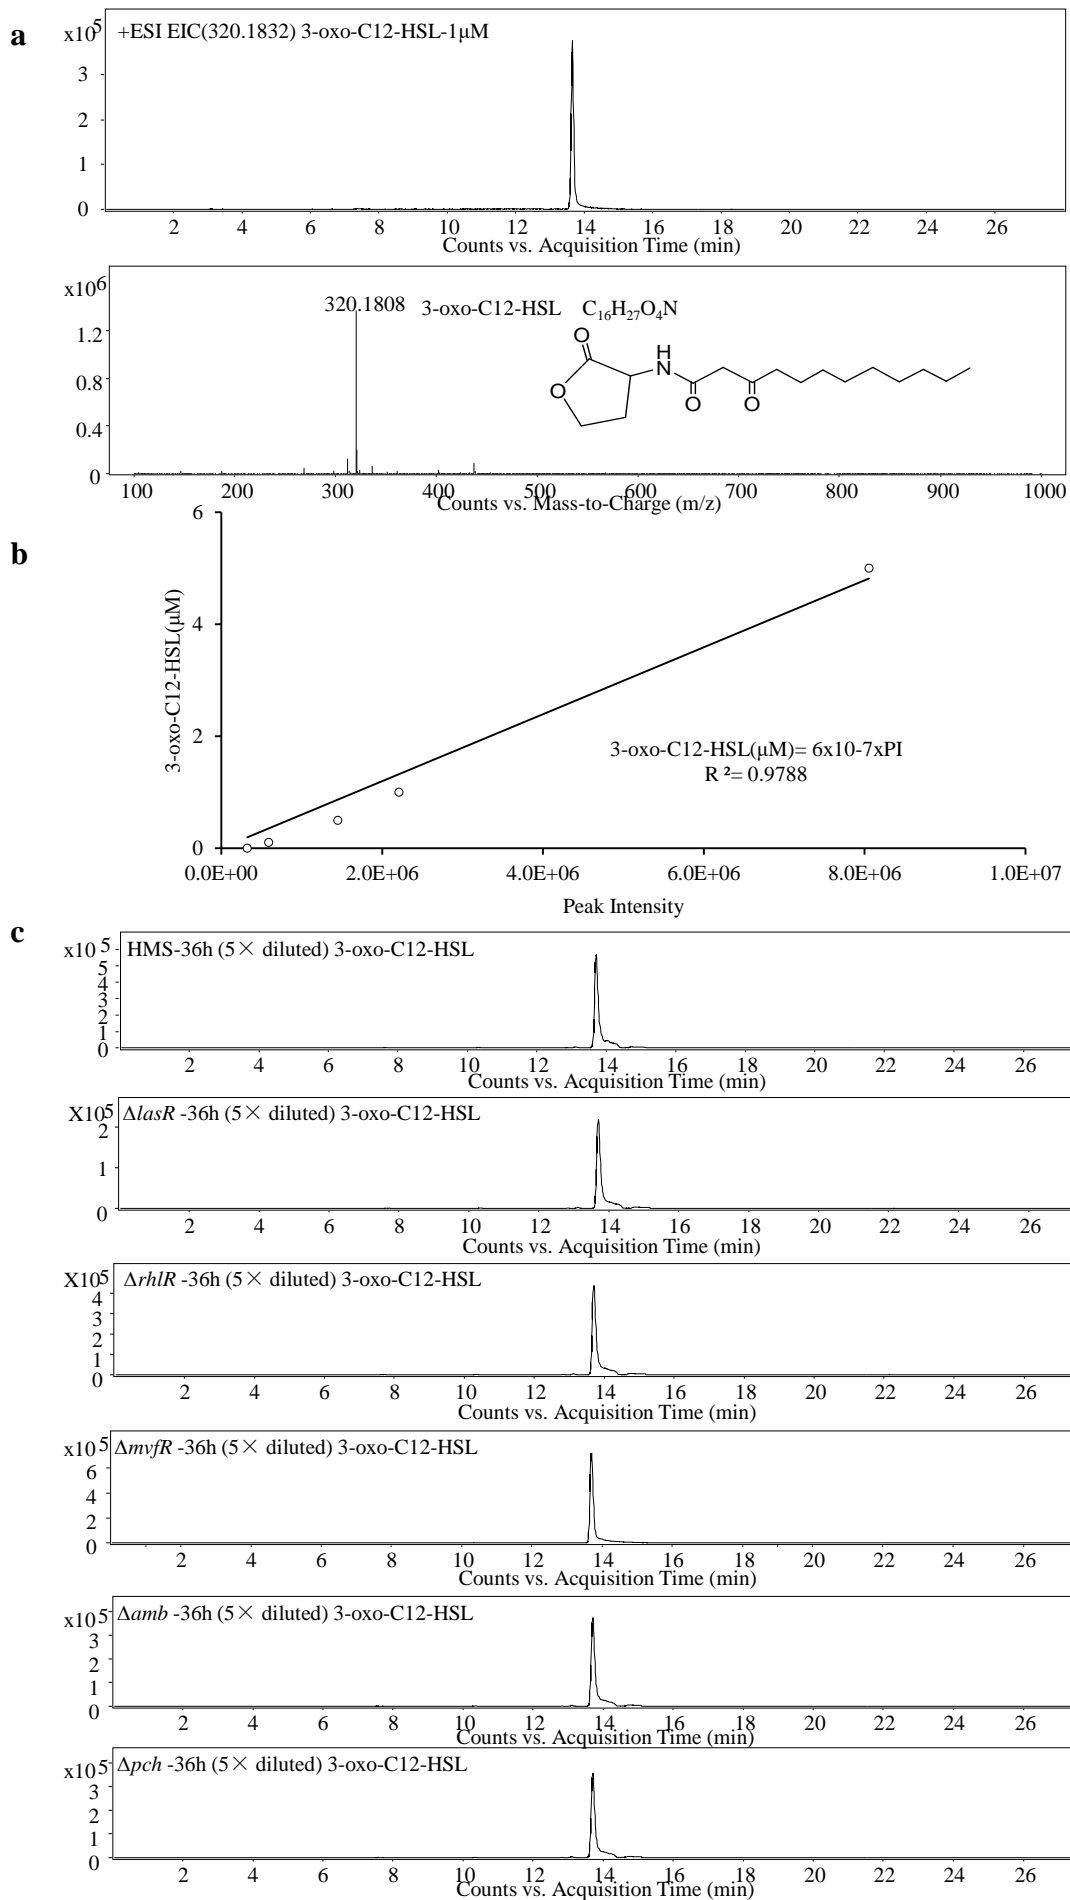

**Supplementary Figure S3** LC-MS analysis of 3-oxo-C12-HSL production in various deletion strains. (a) LC-MS analysis of the commercially available 3-oxo-C12-HSL samples at different concentrations. (b) The standard curve of peak intensity for the specific extracted ion chromatogram (EIC) and 3-oxo-C12-HSL concentrations. (c) EIC chromatograms of extracted 3-oxo-C12-HSL samples.

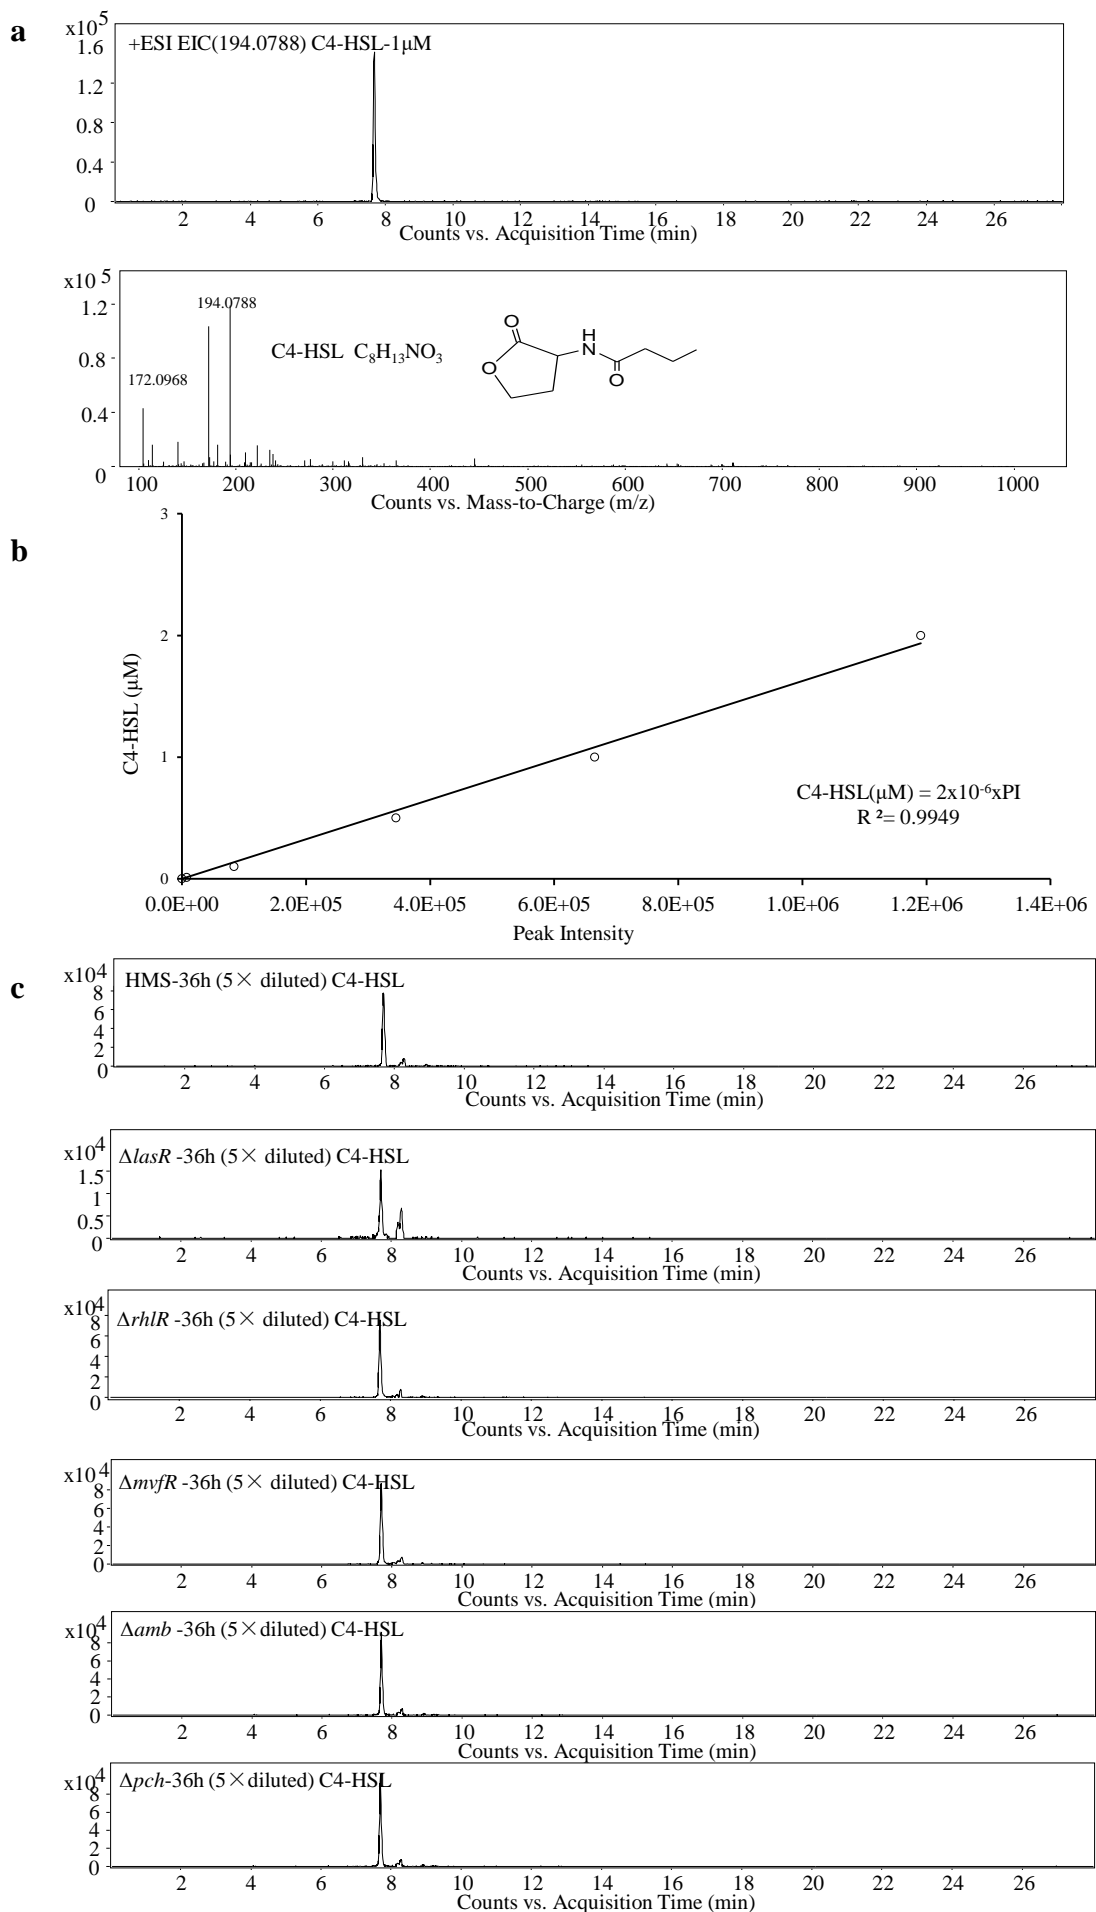

**Supplementary Figure S4** LC-MS analysis of C4-HSL in various PA1201-derived deletion mutation strains. (a) LC-MS analysis of the commercially available C4-HSL. (b) The standard curve of peak intensity for the specific extracted ion chromatogram (EIC) and C4-HSL concentrations. (c) EIC chromatograms of extracted C4-HSL samples

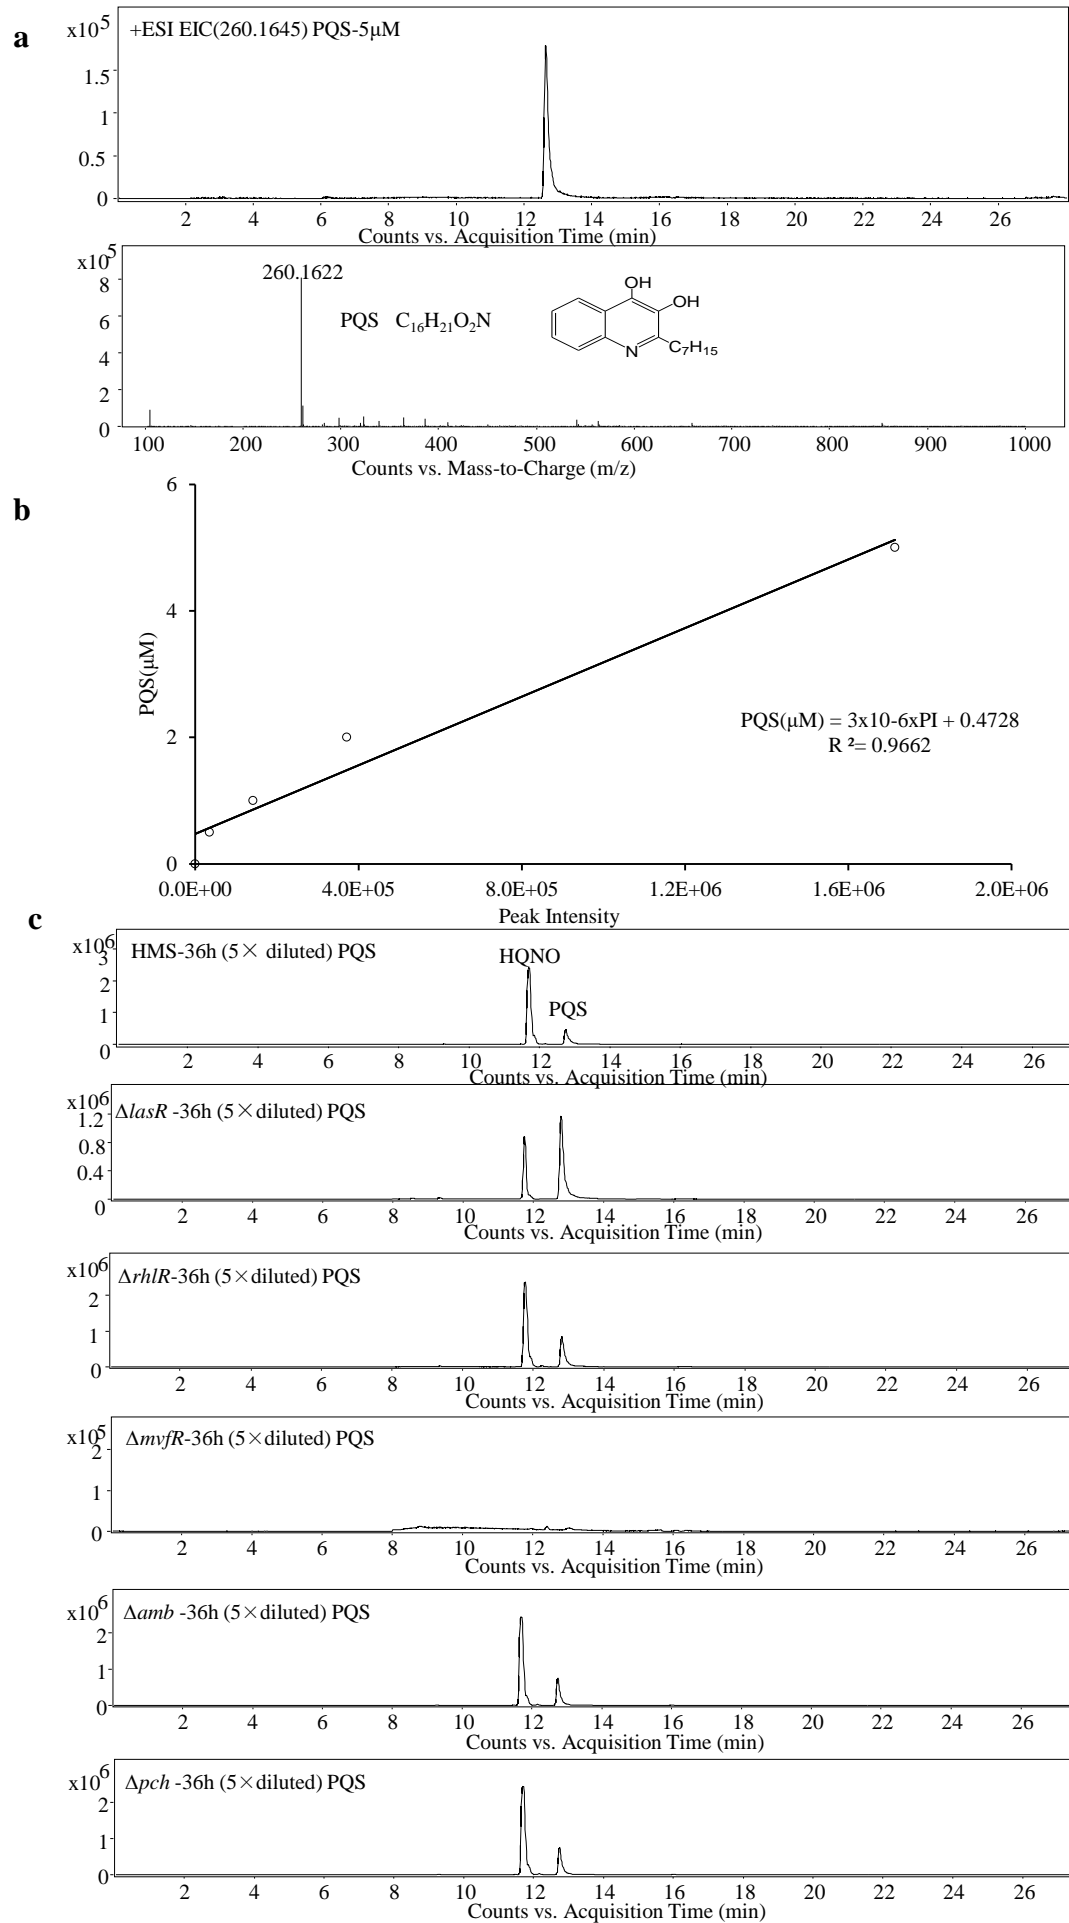

**Supplementary Figure S5** LC-MS analysis of PQS in various PA1201-derived deletion mutation strains. (a) LC-MS analysis of the commercially available PQS. (b) The standard curve of peak intensity for the specific extracted ion chromatogram (EIC) and PQS concentrations. (c) EIC chromatograms of extracted PQS samples.

## Supplementary Table S1 The strains and plasmids used in this study

| Strains                                     | Relevant characteristics                                                                                                                                      | Reference or source |
|---------------------------------------------|---------------------------------------------------------------------------------------------------------------------------------------------------------------|---------------------|
| <i>P. aeruginosa</i> strains                |                                                                                                                                                               |                     |
| PA1201                                      | <i>P. aeruginosa</i> wild-type strain, Spe <sup>R</sup>                                                                                                       | 39                  |
| MSH                                         | PA1201Δ <i>phzMΔphzSΔphzH</i> The <i>phzM</i> , <i>phzS</i> and <i>phzH</i> in-frame deletion mutant, Spe <sup>R</sup>                                        | 40                  |
| MSHΔ <i>lasR</i>                            | <i>lasR</i> in-frame deletion mutant based on MSH, Spe <sup>R</sup>                                                                                           | This study          |
| MSHΔ <i>rhIR</i>                            | <i>rhIR</i> in-frame deletion mutant based on MSH, Spe <sup>R</sup>                                                                                           | This study          |
| MSHΔ <i>mvfR</i>                            | <i>mvfR</i> in-frame deletion mutant based on MSH, Spe <sup>R</sup>                                                                                           | This study          |
| MSHΔ <i>amb</i>                             | <i>ambBCDE</i> in-frame deletion mutant based on MSH, Spe <sup>R</sup>                                                                                        | This study          |
| MSHΔ <i>pch</i>                             | <i>pchABCDEFG</i> in-frame deletion mutant based on MSH, Spe <sup>R</sup>                                                                                     | This study          |
| MSHΔ <i>phz1</i>                            | <i>phzA<sub>1</sub>B<sub>1</sub>C<sub>1</sub>D<sub>1</sub>E<sub>1</sub>F<sub>1</sub>G<sub>1</sub></i> in-frame deletion mutant based on MSH, Spe <sup>R</sup> | 40                  |
| MSHΔ <i>phz1ΔlasR</i>                       | <i>lasR</i> in-frame deletion mutant based on MSHΔ <i>phz1</i> , Spe <sup>R</sup>                                                                             | This study          |
| MSHΔ <i>phz1ΔrhIR</i>                       | <i>rhIR</i> in-frame deletion mutant based on MSHΔ <i>phz1</i> , Spe <sup>R</sup>                                                                             | This study          |
| MSHΔ <i>phz1ΔmvfR</i>                       | <i>mvfR</i> in-frame deletion mutant based on MSHΔ <i>phz1</i> , Spe <sup>R</sup>                                                                             | This study          |
| MSHΔ <i>phz2</i>                            | <i>phzA<sub>2</sub>B<sub>2</sub>C<sub>2</sub>D<sub>2</sub>E<sub>2</sub>F<sub>2</sub>G<sub>2</sub></i> in-frame deletion mutant based on MSH, Spe <sup>R</sup> | 40                  |
| MSHΔ <i>phz2ΔlasR</i>                       | <i>lasR</i> in-frame deletion mutant based on MSHΔ <i>phz2</i> , Spe <sup>R</sup>                                                                             | This study          |
| MSHΔ <i>phz2ΔrhIR</i>                       | <i>rhIR</i> in-frame deletion mutant based on MSHΔ <i>phz2</i> , Spe <sup>R</sup>                                                                             | This study          |
| MSHΔ <i>phz2ΔmvfR</i>                       | <i>mvfR</i> in-frame deletion mutant based on MSHΔ <i>phz2</i> , Spe <sup>R</sup>                                                                             | This study          |
| MSH::P <i>phz1</i> -lacZ                    | Single copy insertion of P <i>phz1</i> -lacZ in the MSH chromosomal attB site                                                                                 | This study          |
| MSHΔ <i>lasR</i> ::P <i>phz1</i> -lacZ      | Single copy insertion of P <i>phz1</i> -lacZ in the MSHΔ <i>lasR</i> chromosomal attB site                                                                    | This study          |
| MSHΔ <i>rhIR</i> ::P <i>phz1</i> -lacZ      | Single copy insertion of P <i>phz1</i> -lacZ in the MSHΔ <i>rhIR</i> chromosomal attB site                                                                    | This study          |
| MSHΔ <i>mvfR</i> ::P <i>phz1</i> -lacZ      | Single copy insertion of P <i>phz1</i> -lacZ in the MSHΔ <i>mvfR</i> chromosomal attB site                                                                    | This study          |
| MSHΔ <i>amb</i> ::P <i>phz1</i> -lacZ       | Single copy insertion of P <i>phz1</i> -lacZ in the MSHΔ <i>amb</i> chromosomal attB site                                                                     | This study          |
| MSHΔ <i>pch</i> ::P <i>phz1</i> -lacZ       | Single copy insertion of P <i>phz1</i> -lacZ in the MSHΔ <i>pch</i> chromosomal attB site                                                                     | This study          |
| MSH::P <i>phz2</i> -lacZ                    | Single copy insertion of P <i>phz2</i> -lacZ in the MSH chromosomal attB site                                                                                 | This study          |
| MSHΔ <i>lasR</i> ::P <i>phz2</i> -lacZ      | Single copy insertion of P <i>phz2</i> -lacZ in the MSHΔ <i>lasR</i> chromosomal attB site                                                                    | This study          |
| MSHΔ <i>rhIR</i> ::P <i>phz2</i> -lacZ      | Single copy insertion of P <i>phz2</i> -lacZ in the MSHΔ <i>rhIR</i> chromosomal attB site                                                                    | This study          |
| MSHΔ <i>mvfR</i> ::P <i>phz2</i> -lacZ      | Single copy insertion of P <i>phz2</i> -lacZ in the MSHΔ <i>mvfR</i> chromosomal attB site                                                                    | This study          |
| MSHΔ <i>amb</i> ::P <i>phz2</i> -lacZ       | Single copy insertion of P <i>phz2</i> -lacZ in the MSHΔ <i>amb</i> chromosomal attB site                                                                     | This study          |
| MSHΔ <i>pch</i> ::P <i>phz2</i> -lacZ       | Single copy insertion of P <i>phz2</i> -lacZ in the MSHΔ <i>pch</i> chromosomal attB site                                                                     | This study          |
| MSHΔ <i>phz2</i> ::P <i>phz1</i> -lacZ      | Single copy insertion of P <i>phz1</i> -lacZ in the MSHΔ <i>phz2</i> chromosomal attB site                                                                    | This study          |
| MSHΔ <i>phz2ΔlasR</i> ::P <i>phz1</i> -lacZ | Single copy insertion of P <i>phz1</i> -lacZ in the MSHΔ <i>phz2ΔlasR</i> chromosomal attB site                                                               | This study          |
| MSHΔ <i>phz2ΔrhIR</i> ::P <i>phz1</i> -lacZ | Single copy insertion of P <i>phz1</i> -lacZ in the MSHΔ <i>phz2ΔrhIR</i> chromosomal attB site                                                               | This study          |
| MSHΔ <i>phz2ΔmvfR</i> ::P <i>phz1</i> -lacZ | Single copy insertion of P <i>phz1</i> -lacZ in the MSHΔ <i>phz2ΔmvfR</i> chromosomal attB site                                                               | This study          |
| MSHΔ <i>phz1</i> ::P <i>phz2</i> -lacZ      | Single copy insertion of P <i>phz2</i> -lacZ in the MSHΔ <i>phz1</i> chromosomal attB site                                                                    | This study          |
| MSHΔ <i>phz1ΔlasR</i> ::P <i>phz2</i> -lacZ | Single copy insertion of P <i>phz2</i> -lacZ in the MSHΔ <i>phz1ΔlasR</i> chromosomal attB site                                                               | This study          |
| MSHΔ <i>phz1ΔrhIR</i> ::P <i>phz2</i> -lacZ | Single copy insertion of P <i>phz2</i> -lacZ in the MSHΔ <i>phz1ΔrhIR</i> chromosomal attB site                                                               | This study          |
| MSHΔ <i>phz1ΔmvfR</i> ::P <i>phz2</i> -lacZ | Single copy insertion of P <i>phz2</i> -lacZ in the MSHΔ <i>phz1ΔmvfR</i> chromosomal attB site                                                               | This study          |

## Supplementary Table S1 The strains and plasmids used in this study

| Strains                    | Relevant characteristics                                                                                                                          | Reference or source |
|----------------------------|---------------------------------------------------------------------------------------------------------------------------------------------------|---------------------|
| Reporter strains           |                                                                                                                                                   |                     |
| <i>C. violaceum</i> CV026  | Double mini-Tn5 mutant derived from <i>C. violaceum</i> ATCC 31532, AHL biosensor                                                                 | 42                  |
| <i>A. tumefaciens</i> CF11 | Harbors two plasmids expressing TraR and the reporter gene lacZ under the tra reporter, respectively                                              | 41                  |
| <i>E. coli</i> strains     |                                                                                                                                                   |                     |
| DH5 $\alpha$               | <i>E. coli</i> F- $\Phi$ 80lacZ $\Delta$ M15 $\Delta$ (lacZYA-argF) U169 recA1 endA1 hsdR17 (rK-, mK+) phoA supE44 $\lambda$ - thi-1 gyrA96 relA1 | Lab collection      |
| pRK2013                    | A conjugative plasmid, Kan <sup>R</sup>                                                                                                           | Lab collection      |
| S17- $\lambda$ pir         | TpR SmR recA, thi, pro, hsdR-M+RP4: 2-Tc:Mu: Kan Tn7 $\lambda$ pir                                                                                | Lab collection      |
| Plasmids                   |                                                                                                                                                   |                     |
| pEX18Gm                    | Gm <sup>R</sup> ; oriT <sup>+</sup> sacB <sup>+</sup> , gene replacement vector with MCS This study from pUC18                                    | 49                  |
| mini-CTX-lacZ              | Tet <sup>R</sup> ; integration-proficient vector for chromosomal insertion at the attB site                                                       | 52                  |
| pEX18Gm- $\Delta$ lasR     | pEX18Gm with the fusion product of the <i>lasR</i> flanking fragments for in-frame deletion of <i>lasR</i> , Gm <sup>R</sup>                      | This study          |
| pEX18Gm- $\Delta$ rhlR     | pEX18Gm with the fusion product of the <i>rhlR</i> flanking fragments for in-frame deletion of <i>rhlR</i> , Gm <sup>R</sup>                      | This study          |
| pEX18Gm- $\Delta$ mvfR     | pEX18Gm with the fusion product of the <i>mvfR</i> flanking fragments for in-frame deletion of <i>mvfR</i> , Gm <sup>R</sup>                      | This study          |
| pEX18Gm- $\Delta$ amb      | pEX18Gm with the fusion product of the <i>ambBCDE</i> flanking fragments for in-frame deletion of <i>amb</i> cluster, Gm <sup>R</sup>             | This study          |
| pEX18Gm- $\Delta$ pch      | pEX18Gm with the fusion product of the <i>pchABCDREFG</i> flanking fragments for in-frame deletion of <i>pch</i> cluster, Gm <sup>R</sup>         | 40                  |
| mini-CTX-Pphz1-lacZ        | integration-proficient vector with the promoter region of <i>phzA1</i> , Tet <sup>R</sup>                                                         | This study          |
| mini-CTX-Pphz2-lacZ        | integration-proficient vector with the promoter region of <i>phzA2</i> , Tet <sup>R</sup>                                                         | This study          |



**Supplementary Table S2** Primers used in this study

| Application                                 | Oligos and sequence(5'to3')                                   |
|---------------------------------------------|---------------------------------------------------------------|
| Deletion of <i>lasR</i>                     | <i>lasR</i> -F1: <u>GGAATTC</u> CAGCGTGGTGGTGTGCGAGATGTT      |
|                                             | <i>lasR</i> -R1: GTGCCCGACGACCCCTGAAGATGT                     |
|                                             | <i>lasR</i> -F2: ggggtcgtcgggcacGCCTGGCGCGAGCATTACGAC         |
|                                             | <i>lasR</i> -R2: <u>CGGGATCC</u> CGCTACGCGGCGGGAGGTCAC        |
|                                             | <i>lasR</i> -con-F: TGGCCTTGGTTGACGGTTTTCTTG                  |
| Deletion of <i>rhlR</i>                     | <i>rhlR</i> -F1: <u>GGAATTC</u> CTGCCGCCGGTACACCCCAAGTTC      |
|                                             | <i>rhlR</i> -R1: CAACCCTATCTGTTATGCCAGCACCG                   |
|                                             | <i>rhlR</i> -F2: taacagatagggttTTCGACGCGCCGAACAAGACG          |
|                                             | <i>rhlR</i> -R2: <u>CGGGATCC</u> GTGCGCGAAACGGCTGACGACCT      |
|                                             | <i>rhlR</i> -con-F: GCTCGCGATTGGGGCCTCTGTGT                   |
| Deletion of <i>mvfR</i>                     | <i>mvfR</i> F1: <u>GGAATTC</u> CACGCGCCACCCAATAAAAGGAAT       |
|                                             | <i>mvfR</i> R1: CGGCGGGATGGCGGTGTC                            |
|                                             | <i>mvfR</i> F2: accgccatcccgccgCGCGCCGACCAGAGTAGAG            |
|                                             | <i>mvfR</i> R2: <u>CCCAAGCTT</u> GAGGCCGAGGAAACCCGCAAC        |
|                                             | <i>mvfR</i> -con-R AGCCGAGCACGCACTGGTTGAAGC                   |
| Deletion of <i>amb</i> cluster              | <i>amb</i> F1: <u>GGAATTC</u> CGCGGCGTACTCCACCATCTGTTC        |
|                                             | <i>amb</i> R1: CGCCGCCAGTACCCCGCTCCATT                        |
|                                             | <i>amb</i> F2: ggggtactggcggcgCCGGCGAACCTGGCAACCTGA           |
|                                             | <i>amb</i> R2: <u>CCCAAGCTT</u> TGGCCGCCGCGAACGCTTAGAAAAA     |
|                                             | <i>amb</i> -con-F: CTCCTCCGCCATGGGGTGTGCTA                    |
|                                             | <i>amb</i> -con-R: CGGCCGTGGACGCTGATGAAGTT                    |
| Deletion of <i>pch</i> cluster              | <i>pch</i> -F1: <u>CGGAATTC</u> GTTCGAATCGCCTACCAGACCGC       |
|                                             | <i>pch</i> -R1: CAATGGGAAGCCAAGGTGAGCGAC                      |
|                                             | <i>pch</i> -F2: cttggettcccattgCCAGCTCACCCATCTCGACCAGGC       |
|                                             | <i>pch</i> -R2: <u>ACGCGTCGAC</u> GAAACCGGCATACCAGTCGTCCCG    |
|                                             | <i>pch</i> -con-F: GCTGGCGCGGACGTTGTAGAGAT                    |
|                                             | <i>pch</i> -con-R: TGCCGCCCGCCAATGATAATAAAT                   |
| Construction of <i>phz1</i> reporter strain | <i>Pphz1</i> -For: <u>GGAATTC</u> CACATTTCCGTAACCCGAGAAGTACCC |
|                                             | <i>Pphz1</i> -Rev: <u>CGGGATCC</u> GGGTGTTTCCCTGTACCCTGACC    |
| Construction of <i>phz2</i> reporter strain | <i>Pphz2</i> -For: <u>GGAATTC</u> CTCAACTCCAGCAACAAGGCGGAG    |
|                                             | <i>Pphz2</i> -Rev: <u>CGGGATCC</u> CCCTTCAACCGTTGGTACTCTCG    |

The sequences with underline are the introduced restriction sites.
